# Supplementary material for: Identification of Methylated Genes Associated with Aggressive Clinicopathological Features in Mantle Cell Lymphoma
Source: PLoS One. 2011 May 16;6(5):e19736. doi: 10.1371/journal.pone.0019736 (PMC3095614; doi:10.1371/journal.pone.0019736)
Supplement: Table S1 — Selected Probes Sets that mapped to sexual crhomosomes. (XLS) [file pone.0019736.s001.xls]

## Sheet: Sheet1
Supplementary Table S1. Selected Probes Sets that mapped to sexual crhomosomes.
Probe Set ID	Gene Symbol	Gene Title	Chromosomal Location
231307_at	LOC100130725 /// PAGE2 /// PAGE2B	similar to PAGE-5 protein /// P antigen family, member 2 (prostate associated) /// P antigen family, member 2B	Xp11.21
1555396_s_at	CXorf67	chromosome X open reading frame 67	Xp11.22
207493_x_at	LOC100130648 /// SSX2 /// SSX2B	similar to Protein SSX2 (Synovial sarcoma, X breakpoint 2) (Cancer/testis antigen 5.2) (CT5.2) (SSX) (HOM-MEL-40) /// synovial sarcoma, X breakpoint 2 /// synovial sarcoma, X breakpoint 2B	Xp11.22
216471_x_at	LOC100130648 /// SSX2 /// SSX2B	similar to Protein SSX2 (Synovial sarcoma, X breakpoint 2) (Cancer/testis antigen 5.2) (CT5.2) (SSX) (HOM-MEL-40) /// synovial sarcoma, X breakpoint 2 /// synovial sarcoma, X breakpoint 2B	Xp11.22
210497_x_at	SSX2	synovial sarcoma, X breakpoint 2	Xp11.22
220057_at	XAGE1A /// XAGE1B /// XAGE1C /// XAGE1D /// XAGE1E	X antigen family, member 1A /// X antigen family, member 1B /// X antigen family, member 1C /// X antigen family, member 1D /// X antigen family, member 1E	Xp11.22
215881_x_at	LOC100130648 /// SSX10 /// SSX2 /// SSX2B /// SSX3 /// SSX5 /// SSX7 /// SSX9	similar to Protein SSX2 (Synovial sarcoma, X breakpoint 2) (Cancer/testis antigen 5.2) (CT5.2) (SSX) (HOM-MEL-40) /// synovial sarcoma, X breakpoint 10 /// synovial sarcoma, X breakpoint 2 /// synovial sarcoma, X breakpoint 2B /// synovial sarcoma, X breakpoint 3 /// synovial sarcoma, X breakpoint 5 /// synovial sarcoma, X breakpoint 7 /// synovial sarcoma, X breakpoint 9	Xp11.22 /// Xp11.23
206897_at	PAGE1	P antigen family, member 1 (prostate associated)	Xp11.23
207666_x_at	SSX3	synovial sarcoma, X breakpoint 3	Xp11.23
211670_x_at	SSX3	synovial sarcoma, X breakpoint 3	Xp11.23
211731_x_at	SSX3	synovial sarcoma, X breakpoint 3	Xp11.23
208586_s_at	SSX4 /// SSX4B	synovial sarcoma, X breakpoint 4 /// synovial sarcoma, X breakpoint 4B	Xp11.23
210394_x_at	SSX4 /// SSX4B	synovial sarcoma, X breakpoint 4 /// synovial sarcoma, X breakpoint 4B	Xp11.23
211425_x_at	SSX4 /// SSX4B	synovial sarcoma, X breakpoint 4 /// synovial sarcoma, X breakpoint 4B	Xp11.23
208528_x_at	SSX5	synovial sarcoma, X breakpoint 5	Xp11.23
207086_x_at	GAGE1 /// GAGE12C /// GAGE12D /// GAGE12E /// GAGE12F /// GAGE12G /// GAGE12H /// GAGE12I /// GAGE12J /// GAGE2A /// GAGE2C /// GAGE2D /// GAGE2E /// GAGE4 /// GAGE5 /// GAGE6 /// GAGE7 /// GAGE8	G antigen 1 /// G antigen 12C /// G antigen 12D /// G antigen 12E /// G antigen 12F /// G antigen 12G /// G antigen 12H /// G antigen 12I /// G antigen 12J /// G antigen 2A /// G antigen 2C /// G antigen 2D /// G antigen 2E /// G antigen 4 /// G antigen 5 /// G antigen 6 /// G antigen 7 /// G antigen 8	Xp11.23 /// Xp11.4-p11.2
207739_s_at	GAGE1 /// GAGE12F /// GAGE12G /// GAGE12I /// GAGE12J /// GAGE2A /// GAGE2B /// GAGE2C /// GAGE2D /// GAGE2E /// GAGE3 /// GAGE4 /// GAGE5 /// GAGE6 /// GAGE7 /// GAGE8	G antigen 1 /// G antigen 12F /// G antigen 12G /// G antigen 12I /// G antigen 12J /// G antigen 2A /// G antigen 2B /// G antigen 2C /// G antigen 2D /// G antigen 2E /// G antigen 3 /// G antigen 4 /// G antigen 5 /// G antigen 6 /// G antigen 7 /// G antigen 8	Xp11.23 /// Xp11.4-p11.2
208155_x_at	GAGE1 /// GAGE12F /// GAGE12G /// GAGE12I /// GAGE12J /// GAGE4 /// GAGE5 /// GAGE6 /// GAGE7	G antigen 1 /// G antigen 12F /// G antigen 12G /// G antigen 12I /// G antigen 12J /// G antigen 4 /// G antigen 5 /// G antigen 6 /// G antigen 7	Xp11.23 /// Xp11.4-p11.2
206640_x_at	GAGE12C /// GAGE12D /// GAGE12E /// GAGE12F /// GAGE12G /// GAGE12H /// GAGE12I /// GAGE2A /// GAGE2C /// GAGE4 /// GAGE5 /// GAGE6 /// GAGE7	G antigen 12C /// G antigen 12D /// G antigen 12E /// G antigen 12F /// G antigen 12G /// G antigen 12H /// G antigen 12I /// G antigen 2A /// G antigen 2C /// G antigen 4 /// G antigen 5 /// G antigen 6 /// G antigen 7	Xp11.23 /// Xp11.4-p11.2
208235_x_at	GAGE12F /// GAGE12G /// GAGE12I /// GAGE7	G antigen 12F /// G antigen 12G /// G antigen 12I /// G antigen 7	Xp11.23 /// Xp11.4-p11.2
206626_x_at	SSX1	synovial sarcoma, X breakpoint 1	Xp11.23-p11.22
206627_s_at	SSX1	synovial sarcoma, X breakpoint 1	Xp11.23-p11.22
207663_x_at	GAGE3	G antigen 3	Xp11.4-p11.2
217120_s_at	MED14	mediator complex subunit 14	Xp11.4-p11.2
207534_at	MAGEB1	melanoma antigen family B, 1	Xp21.3
206218_at	MAGEB2	melanoma antigen family B, 2	Xp21.3
207579_at	MAGEB3	melanoma antigen family B, 3	Xp21.3
1552858_at	MAGEB6	melanoma antigen family B, 6	Xp21.3
244644_at	FAM9C	family with sequence similarity 9, member C	Xp22.2
1555538_s_at	FAM9B	family with sequence similarity 9, member B	Xp22.32
207281_x_at	VCX2	variable charge, X-linked 2	Xp22.32
211403_x_at	VCX2	variable charge, X-linked 2	Xp22.32
230597_at	SLC7A3	solute carrier family 7 (cationic amino acid transporter, y+ system), member 3	Xq13.1
233514_x_at	TEX11	testis expressed 11	Xq13.1
214218_s_at	XIST	X (inactive)-specific transcript (non-protein coding)	Xq13.2
221728_x_at	XIST	X (inactive)-specific transcript (non-protein coding)	Xq13.2
224588_at	XIST	X (inactive)-specific transcript (non-protein coding)	Xq13.2
224589_at	XIST	X (inactive)-specific transcript (non-protein coding)	Xq13.2
224590_at	XIST	X (inactive)-specific transcript (non-protein coding)	Xq13.2
227671_at	XIST	X (inactive)-specific transcript (non-protein coding)	Xq13.2
231131_at	FAM133A	family with sequence similarity 133, member A	Xq21.32
239481_at	FAM133A	family with sequence similarity 133, member A	Xq21.32
209108_at	TSPAN6	tetraspanin 6	Xq22
209109_s_at	TSPAN6	tetraspanin 6	Xq22
227705_at	TCEAL7	transcription elongation factor A (SII)-like 7	Xq22.1
1559258_a_at	CXorf61	chromosome X open reading frame 61	Xq23
227875_at	KLHL13	kelch-like 13 (Drosophila)	Xq23-q24
201887_at	IL13RA1	interleukin 13 receptor, alpha 1	Xq24
201888_s_at	IL13RA1	interleukin 13 receptor, alpha 1	Xq24
210904_s_at	IL13RA1	interleukin 13 receptor, alpha 1	Xq24
211612_s_at	IL13RA1	interleukin 13 receptor, alpha 1	Xq24
1552724_at	RHOXF1	Rhox homeobox family, member 1	Xq24
236920_at	RHOXF2 /// RHOXF2B	Rhox homeobox family, member 2 /// Rhox homeobox family, member 2B	Xq24
228715_at	ZCCHC12	zinc finger, CCHC domain containing 12	Xq24
203875_at	SMARCA1	SWI/SNF related, matrix associated, actin dependent regulator of chromatin, subfamily a, member 1	Xq25
215294_s_at	SMARCA1	SWI/SNF related, matrix associated, actin dependent regulator of chromatin, subfamily a, member 1	Xq25
206609_at	MAGEC1	melanoma antigen family C, 1	Xq26
220793_at	SAGE1	sarcoma antigen 1	Xq26
1567912_s_at	CT45A1 /// CT45A2 /// CT45A3 /// CT45A4 /// CT45A5 /// CT45A6 /// LOC100133581	cancer/testis antigen family 45, member A1 /// cancer/testis antigen family 45, member A2 /// cancer/testis antigen family 45, member A3 /// cancer/testis antigen family 45, member A4 /// cancer/testis antigen family 45, member A5 /// cancer/testis antigen family 45, member A6 /// hypothetical protein LOC100133581	Xq26.3
235700_at	CT45A5	cancer/testis antigen family 45, member A5	Xq26.3
221121_at	CXorf48	chromosome X open reading frame 48	Xq26.3
227909_at	NCRNA00086 /// NCRNA00087	non-protein coding RNA 86 /// non-protein coding RNA 87	Xq26.3
220217_x_at	SPANXC	SPANX family, member C	Xq27.1
210546_x_at	CTAG1A /// CTAG1B	cancer/testis antigen 1A /// cancer/testis antigen 1B	Xq28
211674_x_at	CTAG1A /// CTAG1B	cancer/testis antigen 1A /// cancer/testis antigen 1B	Xq28
217339_x_at	CTAG1A /// CTAG1B	cancer/testis antigen 1A /// cancer/testis antigen 1B	Xq28
215733_x_at	CTAG2	cancer/testis antigen 2	Xq28
214412_at	H2AFB1 /// H2AFB2 /// H2AFB3	H2A histone family, member B1 /// H2A histone family, member B2 /// H2A histone family, member B3	Xq28
207325_x_at	MAGEA1	melanoma antigen family A, 1 (directs expression of antigen MZ2-E)	Xq28
210467_x_at	MAGEA12	melanoma antigen family A, 12	Xq28
1553830_s_at	MAGEA2 /// MAGEA2B	melanoma antigen family A, 2 /// melanoma antigen family A, 2B	Xq28
214603_at	MAGEA2 /// MAGEA2B	melanoma antigen family A, 2 /// melanoma antigen family A, 2B	Xq28
209942_x_at	MAGEA3	melanoma antigen family A, 3	Xq28
214254_at	MAGEA4	melanoma antigen family A, 4	Xq28
214612_x_at	MAGEA6	melanoma antigen family A, 6	Xq28
210437_at	MAGEA9 /// MAGEA9B	melanoma antigen family A, 9 /// melanoma antigen family A, 9B	Xq28
240687_at	PASD1	PAS domain containing 1	Xq28
214183_s_at	TKTL1	transketolase-like 1	Xq28
216370_s_at	TKTL1	transketolase-like 1	Xq28
207918_s_at	TSPY1	testis specific protein, Y-linked 1	Yp11.2
206922_at	LOC652821 /// VCY /// VCY1B	hypothetical protein LOC652821 /// variable charge, Y-linked /// variable charge, Y-linked 1B	Yq11.21 /// Yq11.221
207909_x_at	DAZ1 /// DAZ2 /// DAZ3 /// DAZ4 /// LOC732447	deleted in azoospermia 1 /// deleted in azoospermia 2 /// deleted in azoospermia 3 /// deleted in azoospermia 4 /// similar to deleted in azoospermia-like	Yq11.223
207912_s_at	DAZ1 /// DAZ2 /// DAZ3 /// DAZ4 /// LOC732447	deleted in azoospermia 1 /// deleted in azoospermia 2 /// deleted in azoospermia 3 /// deleted in azoospermia 4 /// similar to deleted in azoospermia-like	Yq11.223
208281_x_at	DAZ1 /// DAZ2 /// DAZ3 /// DAZ4 /// LOC732447	deleted in azoospermia 1 /// deleted in azoospermia 2 /// deleted in azoospermia 3 /// deleted in azoospermia 4 /// similar to deleted in azoospermia-like	Yq11.223
208282_x_at	DAZ1 /// DAZ2 /// DAZ3 /// DAZ4 /// LOC732447	deleted in azoospermia 1 /// deleted in azoospermia 2 /// deleted in azoospermia 3 /// deleted in azoospermia 4 /// similar to deleted in azoospermia-like	Yq11.223
216351_x_at	DAZ1 /// DAZ2 /// DAZ3 /// DAZ4 /// LOC732447	deleted in azoospermia 1 /// deleted in azoospermia 2 /// deleted in azoospermia 3 /// deleted in azoospermia 4 /// similar to deleted in azoospermia-like	Yq11.223
216922_x_at	DAZ1 /// DAZ2 /// DAZ3 /// DAZ4 /// LOC732447	deleted in azoospermia 1 /// deleted in azoospermia 2 /// deleted in azoospermia 3 /// deleted in azoospermia 4 /// similar to deleted in azoospermia-like	Yq11.223
208307_at	RBMY1A1 /// RBMY1B /// RBMY1D /// RBMY1E /// RBMY1F /// RBMY1J	RNA binding motif protein, Y-linked, family 1, member A1 /// RNA binding motif protein, Y-linked, family 1, member B /// RNA binding motif protein, Y-linked, family 1, member D /// RNA binding motif protein, Y-linked, family 1, member E /// RNA binding motif protein, Y-linked, family 1, member F /// RNA binding motif protein, Y-linked, family 1, member J	Yq11.223
